# Supplementary material
Source: PubMed Central journal article supplement (PMC3863388)
Supplement: NIHMS529265-supplement-Supporting_Info.pdf [file NIHMS529265-supplement-Supporting_Info.pdf]

## SUPPORTING INFORMATION

Title: Dihydroorotase from the hyperthermophile, *Aquifex aeolicus*, is activated by stoichiometric association with aspartate transcarbamoylase and forms a one pot reactor for pyrimidine biosynthesis

Authors: Pengfei Zhang, Philip Martin, Cristina Purcarea, Asmita Vaishnav, Joseph S. Brunzelle, Roshini Fernando, Hedeel I. Guy-Evans, David R. Evans, and Brian F. P. Edwards

Table S1: Representative structures for carbamoyl phosphate synthetase, aspartate transcarbamoylase, and dihydroorotase.

| Enzyme | Class | Species                               | PDB  | Limit                 | Ligands <sup>1</sup> | No. Id. <sup>2</sup> | Citation <sup>3</sup> |
|--------|-------|---------------------------------------|------|-----------------------|----------------------|----------------------|-----------------------|
| CPS    |       | <i>Escherichia coli</i>               | 1JDB | 2.10                  | None                 |                      | (1)                   |
| ATC    | A     | <i>Aquifex aeolicus</i> (DAC)         | 3D6N | 2.3                   | None<br>(T-state)    | 291                  | Paper                 |
| ATC    | C     | <i>Bacillus subtilis</i>              | 2AT2 | 3.00<br>(C $\alpha$ ) | None<br>(T-state)    | 118                  | (2)                   |
| ATC    | C     | <i>Pyrococcus abyssi</i>              | 1ML4 | 1.80                  | PALA<br>(R-state)    | 99                   | (3)                   |
| ATC    | B     | <i>Escherichia coli</i>               | 6AT1 | 2.60                  | None<br>(T-state)    | 89                   | (4)                   |
| ATC    | B     | <i>Escherichia coli</i>               | 1D09 | 2.10                  | PALA<br>(R-state)    | 90                   | (5)                   |
| ATC    | B     | <i>Escherichia coli</i><br>(C-trimer) | 3CSU | 1.88                  | None<br>(T-state)    | 91                   | (6)                   |
| ATC    | B     | <i>Escherichia coli</i><br>(C-trimer) | 1EKX | 1.95                  | PALA<br>(R-state)    | 91                   | (6)                   |
| ATC    | C     | <i>Sulfolobus acidocaldarius</i>      | 1PG5 | 2.60                  | None<br>(T-state)    | 88                   | (7)                   |
| ATC    | B     | <i>Moritella profunda</i>             | 2BE7 | 2.85                  | None<br>(T-state)    | 81                   | (8)                   |
| DHO    | I     | <i>Aquifex aeolicus</i> (DAC)         | 3D6N | 2.3                   | FLC                  | 422                  | Paper                 |
| DHO    | I     | <i>Aquifex aeolicus</i>               | 1XRF | 1.65                  | None                 | 422                  | (9)                   |

|     |    |                                  |                |      |            |     |        |
|-----|----|----------------------------------|----------------|------|------------|-----|--------|
| DHO | I  | <i>Aquifex aeolicus</i>          | 1XRT           | 1.61 | None       | 422 | (9)    |
| DHO | I  | <i>Thermus thermophilus</i>      | 2Z00           | 2.42 | None       | 158 | RSGI   |
| DHO | I  | <i>Porphyromonas gingivalis</i>  | 2GWN           | 1.85 | CAC        | 128 | MCSG   |
| DHO | II | <i>Escherichia coli</i>          | 1J79A<br>1J79B | 1.70 | ORO<br>NCD | 68  | (10)   |
| DHO | II | <i>Escherichia coli</i> (T109S)  | 2E25           | 2.70 | FOT        | 68  | (11)   |
| DHO | II | <i>Escherichia coli</i>          | 1XGE           | 1.90 | NCD<br>DOR | 68  | (12)   |
| DHO | II | <i>Escherichia coli</i>          | 2EG6 (h)       | 1.70 | None       | 68  | (13)   |
| DHO | II | <i>Escherichia coli</i>          | 2EG7 (h)       | 2.00 | HDDP       | 68  | (13)   |
| DHO | II | <i>Escherichia coli</i>          | 2EG8 (h)       | 2.20 | FOT        | 68  | (13)   |
| DHO | I  | <i>Agrobacterium tumefaciens</i> | 2OGJ           | 2.62 | None       | 27  | NSGXRC |

---

<sup>1</sup> Ligand codes: CAC = cacodylate ion; DOR = (4S)-2,3-dioxohexahydropyrimidine-4-carboxylic acid; FOT = 5-fluoro-2,6-dioxo-1,2,3,6-tetrahydropyrimidine-4-carboxylic acid (5-fluoroorotate); HDDP = 2-oxo-1,2,3,6-tetrahydropyrimidine-4,6-dicarboxylic acid; NCD = lysine NZ-carboxylic acid; ORO = orotic acid

<sup>2</sup> Number of identical residues from a Blast search of the Protein Data Bank using the sequence of the corresponding protein from *Aquifex aeolicus*.

<sup>3</sup> MCSG = Midwest Center for Structural Genomics, paper “to be published”; NSGXRC = New York Structural GenomiX Research Consortium, paper “to be published”; RSGI = RIKEN Structural Genomics/Proteomics Initiative.

|       |                                                                                                                           |                                             |                             |     |     |     |
|-------|---------------------------------------------------------------------------------------------------------------------------|---------------------------------------------|-----------------------------|-----|-----|-----|
|       | 10                                                                                                                        | 20                                          | 30                          | 40  | 50  |     |
| AaDAC | - - M L K L I V K N G Y V I D P S Q N L E G E F D I L V E N G K I K K I - - -                                             | D K N I L V P E A E I I D A K G L I V C P   | 55                          |     |     |     |
| TtDHO | - - - M I L I R N V R L V D A R G E R G P A D V L I G E G R I L S - - -                                                   | - - - L E G G E A K Q V V D G T G C F L A P | 49                          |     |     |     |
| PgDHO | S N A M K I L L R N A L I T N E G K T F P G S V M I D G A F I S R I I E G E L P A D D N L S A D E V I E C S G L R L F P   | 60                                          |                             |     |     |     |
| EcDHO | - - - - - S Q V L K I R - - - - -                                                                                         | - - - - -                                   | 7                           |     |     |     |
| AtDHO | - - Q A P I L L T N V K P V G F G K G A S Q S S T D I L I G G D G K I A A - -                                             | V G S A L Q A P A D T Q R I D A A F I S P   | 71                          |     |     |     |
|       | 60                                                                                                                        | 70                                          | 80                          | 90  | 100 | 110 |
| AaDAC | G F I D I H V H L - R D P G Q T Y K E D I - E S G S R C A - V A G G F T T I V C M P N T N P P I D - -                     | N T T V V N Y I L                           | 110                         |     |     |     |
| TtDHO | G F L D L H A H L - R E P G E E V K E D L - F S G L L A A - V R G G Y T D L V S M P N T K P P V D - -                     | T P E A V R A L K                           | 104                         |     |     |     |
| PgDHO | G C I D D Q V H F - R E P G L T H K A T I - A S E S R A A - V A G G V T S F M D M P N T N P P T T - -                     | M W E R L L E K R                           | 112                         |     |     |     |
| EcDHO | R P D D W H L H L - R D G - D - - M L - K T V V P Y T - S E - I Y G R A I V M P N L A P P V T - -                         | T V E A A V A Y R                           | 59                          |     |     |     |
| AtDHO | G W V D L H V H I W H G G T D I - - S I R P S E - - - C G A E R G V T T L V D A G S - - -                                 | A G E A N F H G F R E Y I                   | 121                         |     |     |     |
|       | 120                                                                                                                       | 130                                         | 140                         |     |     |     |
| AaDAC | Q K S K S V G L - - - - C R V L P T G T I T K G R - - - - -                                                               | K G K E - I - A - - - D F - -               | Y S L K E A G - - -         | 146 |     |     |
| TtDHO | E K A K A L G L - - - - A R L H P A A A L T E K Q - - - - -                                                               | E G K T - L - T - - P A - -                 | G L L R E A G - - -         | 140 |     |     |
| PgDHO | Q I G A D T A W - - - - A N Y G F F F G G T - - - - -                                                                     | - - - - - N D N I D E - - -                 | I K - - R V D K - H L - - - | 144 |     |     |
| EcDHO | Q R I L D A V P A G H D F T P L M T C Y L T - - - - -                                                                     | - - - - - D S - L - D P - N E L - -         | E R G F N E G V - - -       | 97  |     |     |
| AtDHO | I - - E P S R - - - - - E R I K A F L N L G S I G L V A C N R V P E L R D I K D I - -                                     | D L D R I L E C Y A E - - -                 | N S E H                     | 170 |     |     |
|       | 150                                                                                                                       | 160                                         | 170                         | 180 |     |     |
| AaDAC | C V A F T - D - - - - - D - - - - G - - - - S P V M D S S V M R K A L E L A S Q L G V P I M D H                           | C E D D K - - L A Y                         | 188                         |     |     |     |
| TtDHO | A V L L T - D - - - - - D - - - - G - - - - R T N E D A G V L A A G L L M A A P L G L P V A V H                           | A E D A G - - L R R                         | 182                         |     |     |     |
| PgDHO | V P G L K - L - - - - - F L G - S S T G N M L V - D N K E T L E K I F G E C D - -                                         | L L I A T H C E K E E - - I I R             | 189                         |     |     |     |
| EcDHO | F T A A K L Y P A N A T T N S S - - H G - - - V - - T S V D A I M P V L E R M E K I G M P L L V H                         | G E V T H A D I D                           | 149                         |     |     |     |
| AtDHO | I V G L X - V - - - - - R A S H V I - - - - T G S W G V T P V K L G K K I A K I L K V P M M V H                           | V G E P P A - L - -                         | 215                         |     |     |     |
|       | 190                                                                                                                       | 200                                         | 210                         | 220 | 230 |     |
| AaDAC | G V I N E G E V - - - - - S A L L G L S S R A P - - - - E A E E I - Q I A R D G I L A Q R - - - -                         | T G G H V H I Q H                           | 232                         |     |     |     |
| TtDHO | N G V M N D G P L - - - - - A D L L G L P G N P P - - - - E A E A A - R I A R D L E V L R Y A L R R S P A T P R L H V Q H | 233                                         |                             |     |     |     |
| PgDHO | A N K E H Y K A K Y G N D L D I H F H P L I R S E - - - - E A C Y R - S S A E A V E L A E R - - - -                       | M N A R L H I L H                           | 239                         |     |     |     |
| EcDHO | - - - - - F D R E A R F - I E S V M E P L - - - - R Q R L - - - - T A L K V V F E H                                       | 177                                         |                             |     |     |     |
| AtDHO | - - - - - Y - - - - D - - E V - L E I L G - - - - P - - - - - - - - - G D V V T - H                                       | 231                                         |                             |     |     |     |
|       | 240                                                                                                                       | 250                                         | 260                         | 270 |     |     |
| AaDAC | V S - - - - - T K - - - L S - - - L E I I E F F K E K - - - - G V K I T C E V - N P N H L L F T E R E - -                 | V L N S G                                   | 272                         |     |     |     |
| TtDHO | L S - - - - - T K - - - R G - - - L E L V R E A K R A - - - - G L P V T A E A - T P H H L T L T E E A - -                 | L R T F D                                   | 273                         |     |     |     |
| PgDHO | L S - - - - - T E - - - K E - - - L S - - - L F R N D I P T A Q K R I T S E V - C V H H L W F S D T D - -                 | Y G R L G                                   | 280                         |     |     |     |
| EcDHO | I T - - - - - T K - - - D A - - - A D Y V R D G N E - - - - R L A A T I - T P Q H L M F N R N H M L V                     | G G V R                                     | 216                         |     |     |     |
| AtDHO | C F N G K S G S S I M E D E D L F N L A E - - - - R C E - - - - - G I R L D I G H - G - - - - - - - -                     | 266                                         |                             |     |     |     |
|       | 280                                                                                                                       | 290                                         | 300                         | 310 | 320 |     |
| AaDAC | A N A R V N P P L R K K E D R L A L I E G V K R - G I I D C F A T D H A P H Q T F E K E L - V E F A M P G I I - -         | G L                                         | 327                         |     |     |     |
| TtDHO | P L F K V A P P L R G E E D R E A L L E G L L D - G T L D A I A T D H A P H T L A E K E K D L L R A P F G I P - -         | S L                                         | 329                         |     |     |     |
| PgDHO | N R I K W N P A I K K E S D R E A L R A A V R N - G R I D I I A T D H A P H L L R E K E G S C L Q A A S G G P - -         | L V                                         | 336                         |     |     |     |
| EcDHO | P H L Y C L P I L K R N I H Q Q A L R E L V A S G F N R V F L G T D S A P H A R H R K E S - S C G C A G C F - -           | N A                                         | 371                         |     |     |     |
| AtDHO | - - - G A S F S F - - - K V A E A A I A R - - - G L L - P F S I S T D L H G H - - - - - - - - - S M N F P V W             | 302                                         |                             |     |     |     |
|       | 330                                                                                                                       | 340                                         | 350                         | 360 | 370 |     |
| AaDAC | Q - - T A L P S A L E L - Y R K G I I S L K K L I E M F T I N P A R I I G V D L - G T - -                                 | L K L - G S P A D I T - - - -               | 376                         |     |     |     |
| TtDHO | E V - A F P L L Y T E L - H L K R G F P L Q R L V E L F T D G P R R V L G L P P - L H - L E E -                           | G A E A S L V - - - -                       | 379                         |     |     |     |
| PgDHO | Q - - H S L L A L L E L - C N Q G I F S I E E I V S K T A H I P A T L F A I E K R G Y - -                                 | I R P - G Y Y A D L V - - - -               | 386                         |     |     |     |
| EcDHO | P - - T A L G S Y A T V F E E M - N A L - Q H F E A F C S V N G P Q F Y G L P V - N - D - - -                             | T - F I E L V R E                           | 317                         |     |     |     |
| AtDHO | D L A T T M S K L L S V - D - - - M P F E N V V E A V T R N P A S V I R L D - - -                                         | M E N R L D V G Q R A D F T - - - -         | 350                         |     |     |     |
|       | 380                                                                                                                       | 390                                         | 400                         |     |     |     |
| AaDAC | - - - - - I F D P N K E W I L N E E T N L S K S R N T P L W G K V L K G K                                                 | 408                                         |                             |     |     |     |
| TtDHO | - - - - - L L S P K E R P V D P S A F A S K A R Y S P W A G W V L G G W P                                                 | 411                                         |                             |     |     |     |
| PgDHO | - - - - - L V D P S S P H T V S A D N I L S L C G W S P F E G F T F S H S                                                 | 418                                         |                             |     |     |     |
| EcDHO | E Q Q V A E S I A L T D D T L V P F L A G E T V R W S V K - - - - -                                                       | 346                                         |                             |     |     |     |
| AtDHO | - - - - - V F D L V D A D L E A T D S N G D V S R L K R L F E P R Y A V I                                                 | 382                                         |                             |     |     |     |
|       | 410                                                                                                                       | 420                                         |                             |     |     |     |
| AaDAC | V I Y T I K D G K M V Y K D - - - - -                                                                                     | 422                                         |                             |     |     |     |
| TtDHO | V L T L V A G R I V H E A L K - - - - -                                                                                   | 427                                         |                             |     |     |     |
| PgDHO | V A Y T F V N G C L A Y A K G R L A E S R P T V H P L F F N                                                               | 448                                         |                             |     |     |     |
| EcDHO | - - - - -                                                                                                                 |                                             |                             |     |     |     |
| AtDHO | G A E A I A A S R Y I P R A - - - - -                                                                                     | 396                                         |                             |     |     |     |

**Figure S1. Structure-based sequence alignment for AaeDHO.** The sequences of dihydroorotases from *T. thermophilus* (2z00A.pdb), *P. gingivalis* (2gwnA.pdb), *E. coli* (1xgeB.pdb), and *A. tumefaciens* (2ogjA.pdb) are aligned with the sequence of AaeDHO based upon the structural equivalences identified by SSM (14). The rmsd values for AaeATC superposed onto TthDHO, PgiDHO, EcoDHO and AtuDHO are 1.1 Å, 1.7 Å, 2.4 Å, and 3.3 Å, respectively. The ruler above each block gives the position in the sequence of AaeDHO; the sequence number for the other aligned structures are given at the end of each row. Identities with AaeDHO have a grey background. AaeDHO residues assigned to a specific interface by PISA are marked with the appropriate color in the cell above them – or in the two cells above if the residue participates in two interfaces. The primary residues in the active site are boxed. AaeDHO residues assigned to loops-A, -B, and -C, which start respectively at H180, N257, and Q310, are flagged with horizontal bars. The carboxylated lysine (KCX102) in EcoDHO is marked with an ‘X’. Only the first two letters of the species prefixes are used in this figure.

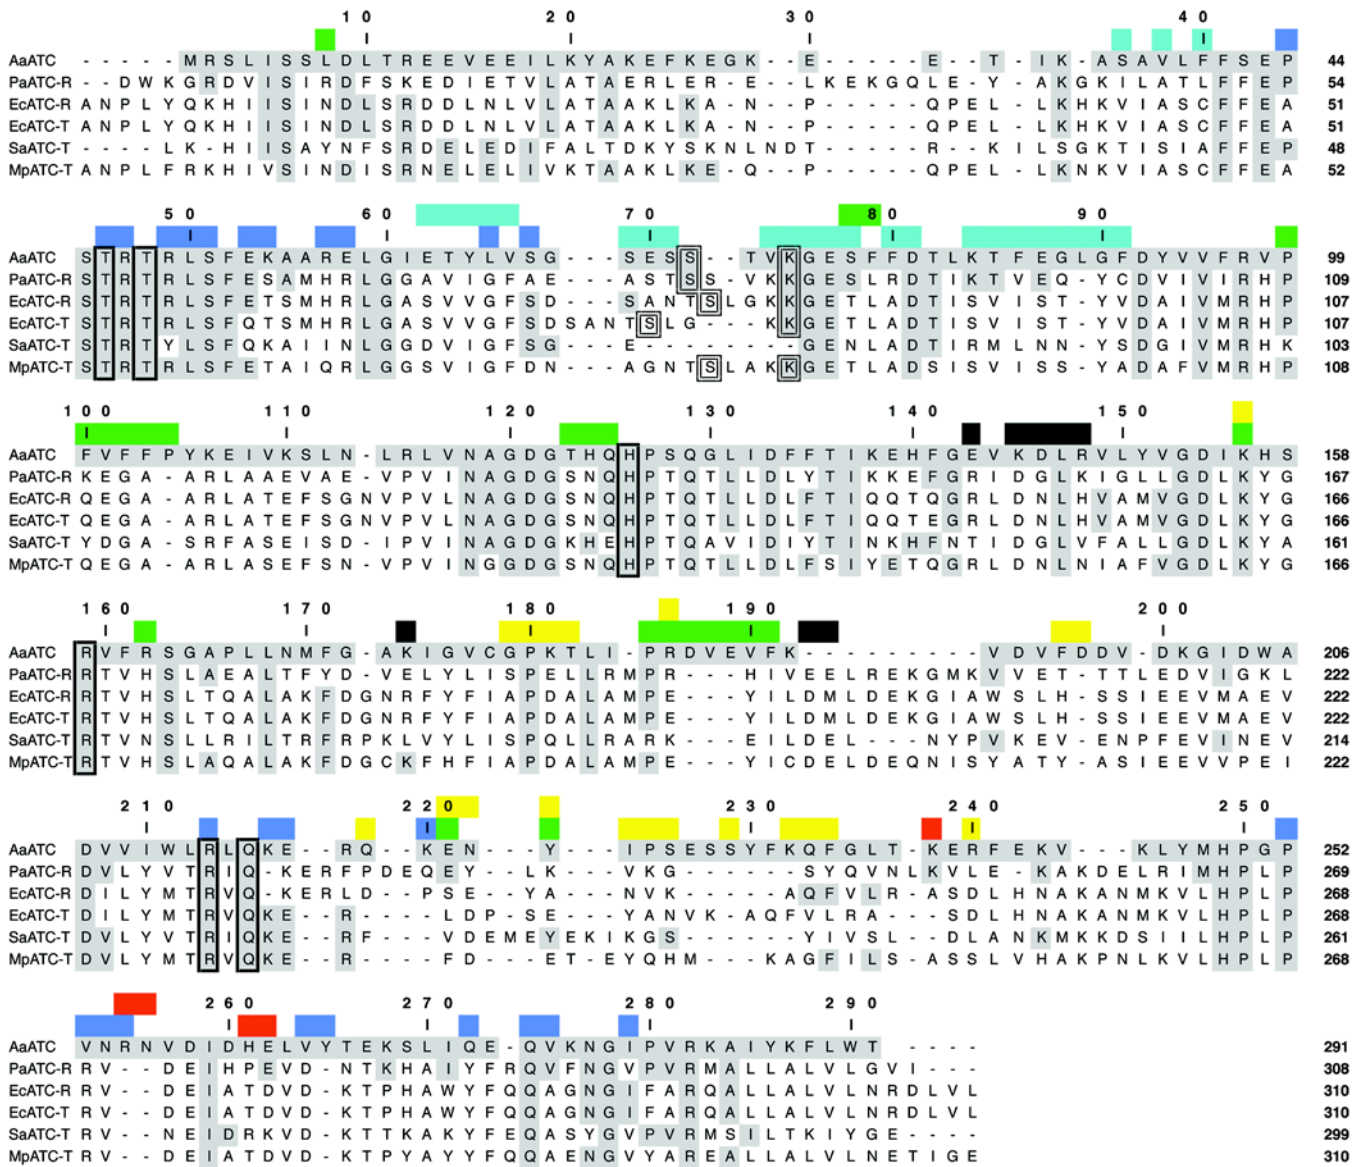

**Figure S2. Structure-based sequence alignment for AaeATC.** The sequences of aspartate transcarbamoylase from *T. abyssi* (R-state; 1ml4A.pdb), *E. coli* (R-state: 1d09A.pdb; T-state: 6at1A.pdb), *S. acidophilus* (T-state; 1pg5A.pdb), and *M. profunda*. (T-state; 2be7A.pdb) are aligned with the sequence of AaeATC based upon the structural equivalences identified by SSM (14). The rmsd values relative to AaeATC are 1.9 Å, 1.9 Å, 2.2 Å, 2.1 Å, and 2.3 Å, respectively. The ruler above each block gives the position in the sequence of AaeATC; sequence numbers for the other aligned structures are given at the end of each row. Identities with AaeATC have a grey background. AaeATC residues assigned to a specific interface by PISA are marked with the appropriate color in the cell above them – or in the two cells above if the residue participates in two interfaces. The primary residues in the active

site are boxed with single lines; the residues participating in the active site of an adjacent catalytic chain are boxed with double lines. Only the first two letters of the species prefixes are used in this figure.

## REFERENCES

1. Thoden, J. B., Holden, H. M., Wesenberg, G., Raushel, F. M., and Rayment, I. (1997) Structure of carbamoyl phosphate synthetase: a journey of 96 Å from substrate to product, *Biochemistry* 36, 6305-6316.
2. Stevens, R. C., Reinisch, K. M., and Lipscomb, W. N. (1991) Molecular structure of *Bacillus subtilis* aspartate transcarbamoylase at 3.0 Å resolution, *Proc Natl Acad Sci U S A* 88, 6087-6091.
3. Van Boxstael, S., Cunin, R., Khan, S., and Maes, D. (2003) Aspartate transcarbamylase from the hyperthermophilic archaeon *Pyrococcus abyssi*: thermostability and 1.8Å resolution crystal structure of the catalytic subunit complexed with the bisubstrate analogue N-phosphonacetyl-L-aspartate, *J Mol Biol* 326, 203-216.
4. Stevens, R. C., Gouaux, J. E., and Lipscomb, W. N. (1990) Structural consequences of effector binding to the T state of aspartate carbamoyltransferase: crystal structures of the unligated and ATP- and CTP-complexed enzymes at 2.6-Å resolution, *Biochemistry* 29, 7691-7701.
5. Jin, L., Stec, B., Lipscomb, W. N., and Kantrowitz, E. R. (1999) Insights into the mechanisms of catalysis and heterotropic regulation of *Escherichia coli* aspartate transcarbamoylase based upon a structure of the enzyme complexed with the bisubstrate analogue N-phosphonacetyl-L-aspartate at 2.1 Å, *Proteins* 37, 729-742.
6. Endrizzi, J. A., Beernink, P. T., Alber, T., and Schachman, H. K. (2000) Binding of bisubstrate analog promotes large structural changes in the unregulated catalytic trimer of aspartate transcarbamoylase: implications for allosteric regulation induced cell migration, *Proc Natl Acad Sci U S A* 97, 5077-5082.
7. De Vos, D., Van Petegem, F., Remaut, H., Legrain, C., Glansdorff, N., and Van Beeumen, J. J. (2004) Crystal structure of T state aspartate carbamoyltransferase of the hyperthermophilic archaeon *Sulfolobus acidocaldarius*, *J Mol Biol* 339, 887-900.

8. De Vos, D., Hulpiau, P., Vergauwen, B., Savvides, S. N., and Van Beeumen, J. (2005) Expression, purification, crystallization and preliminary X-ray crystallographic studies of a cold-adapted aspartate carbamoyltransferase from *Moritella profunda*, *Acta Crystallograph Sect F Struct Biol Cryst Commun* 61, 279-281.
9. Martin, P. D., Purcarea, C., Zhang, P., Vaishnav, A., Sadecki, S., Guy-Evans, H. I., Evans, D. R., and Edwards, B. F. (2005) The crystal structure of a novel, latent dihydroorotase from *Aquifex aeolicus* at 1.7Å resolution, *J Mol Biol* 348, 535-547.
10. Thoden, J. B., Phillips, G. N., Jr., Neal, T. M., Raushel, F. M., and Holden, H. M. (2001) Molecular Structure of Dihydroorotase: A Paradigm for Catalysis through the Use of a Binuclear Metal Center, *Biochemistry* 40, 6989-6997.
11. Lee, M., Maher, M. J., and Guss, J. M. (2007) Structure of the T109S mutant of *Escherichia coli* dihydroorotase complexed with the inhibitor 5-fluoroorotate: catalytic activity is reflected by the crystal form, *Acta Crystallograph Sect F Struct Biol Cryst Commun* 63, 154-161.
12. Lee, M., Chan, C. W., Mitchell Guss, J., Christopherson, R. I., and Maher, M. J. (2005) Dihydroorotase from *Escherichia coli*: loop movement and cooperativity between subunits, *J Mol Biol* 348, 523-533.
13. Lee, M., Chan, C. W., Graham, S. C., Christopherson, R. I., Guss, J. M., and Maher, M. J. (2007) Structures of Ligand-free and Inhibitor Complexes of Dihydroorotase from *Escherichia coli*: Implications for Loop Movement in Inhibitor Design, *J Mol Biol*.
14. Krissinel, E., and Henrick, K. (2004) Secondary-structure matching (SSM), a new tool for fast protein structure alignment in three dimensions, *Acta Crystallogr D Biol Crystallogr* 60, 2256-2268.
